# Supplementary material for: Effects of subnanometer silver clusters on the AgBr(110) photocatalyst surface: a theoretical investigation
Source: Royal Society of Chemistry journal article supplement (doi:10.1039/c5cy00705d), 2015-01-01
Supplement: c5cy00705d1.pdf [file c5cy00705d1.pdf]

## Electronic Supplementary Information

### Effects of Subnanometer Silver Clusters on Photocatalyst AgBr(110)

#### Surface: A Theoretical Investigation

Yuhua Chi,<sup>a b</sup> Lianming Zhao,<sup>a b</sup> Xiaoqing Lu,<sup>a b</sup> Changhua An,<sup>a b</sup> Wenyue Guo,<sup>\*a b</sup>

Yunqi Liu,<sup>\*\* c</sup> and Chi-Man Lawrence Wu<sup>d</sup>

<sup>a</sup>College of Science, China University of Petroleum, Qingdao, Shandong 266580, P.  
R. China

<sup>b</sup>Key Laboratory of New Energy Physics & Materials Science in Universities of  
Shandong Province, China University of Petroleum, Qingdao, Shandong 266580, P.  
R. China

<sup>c</sup>State Key Laboratory of Heavy Oil Processing, Key Laboratory of Catalysis, CNPC,  
China University of Petroleum, Qingdao 266580, P. R. China

<sup>d</sup>Department of Physics and Materials Science, City University of Hong Kong, Hong  
Kong SAR, P. R. China

(Correspondence should be addressed to [wyguo@upc.edu.cn](mailto:wyguo@upc.edu.cn),  
[liuyq@upc.edu.cn](mailto:liuyq@upc.edu.cn).)

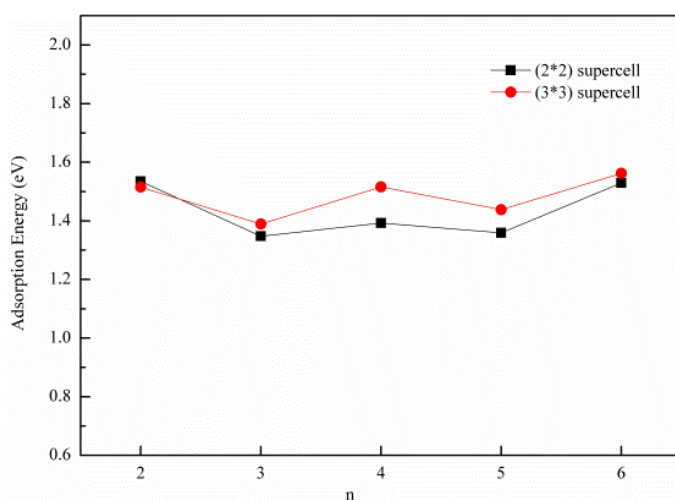

**Fig. S1.** The adsorption energies of  $\text{Ag}_n$  on the  $\text{AgBr}(110)$  supercells of  $(2 \times 2)$  (black) and  $(3 \times 3)$  (red).

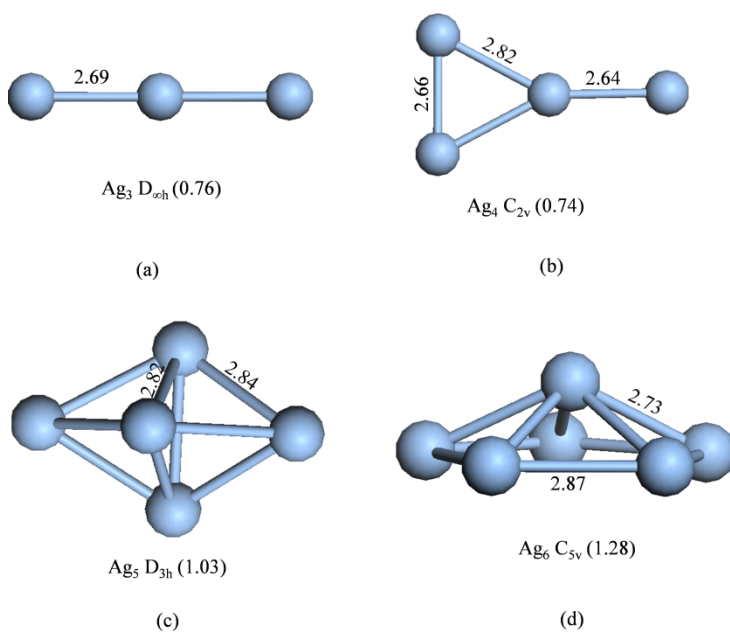

**Fig. S2.** The second most stable structures of clusters  $\text{Ag}_n$  ( $n = 3 - 6$ ) with the bond lengths in Å. Given below are the symmetry groups together with the binding energies in eV.

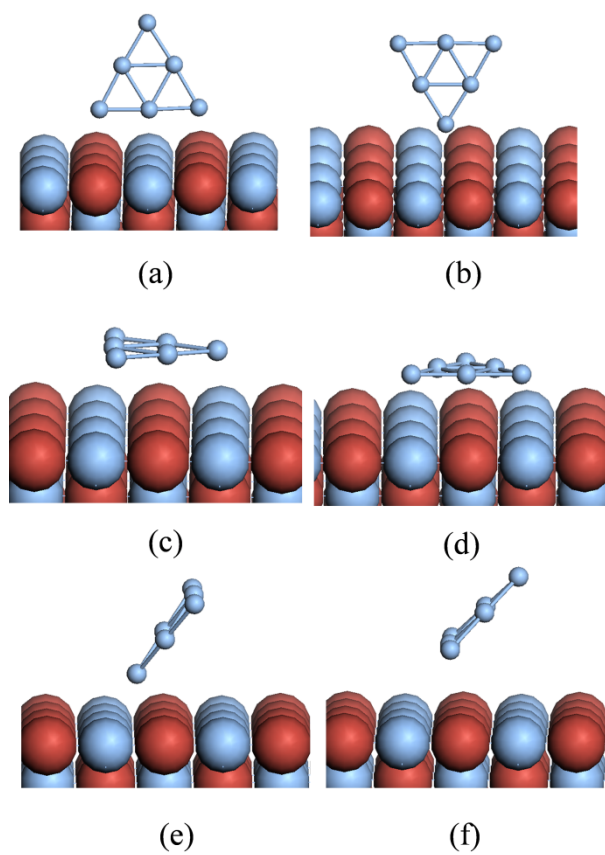

**Fig. S3.** The adsorption mode for the most stable  $\text{Ag}_n$  cluster on the  $\text{AgBr}(110)$  surface. (a) and (b) vertical; (c) and (d) horizontal; (e) and (f) inclined.

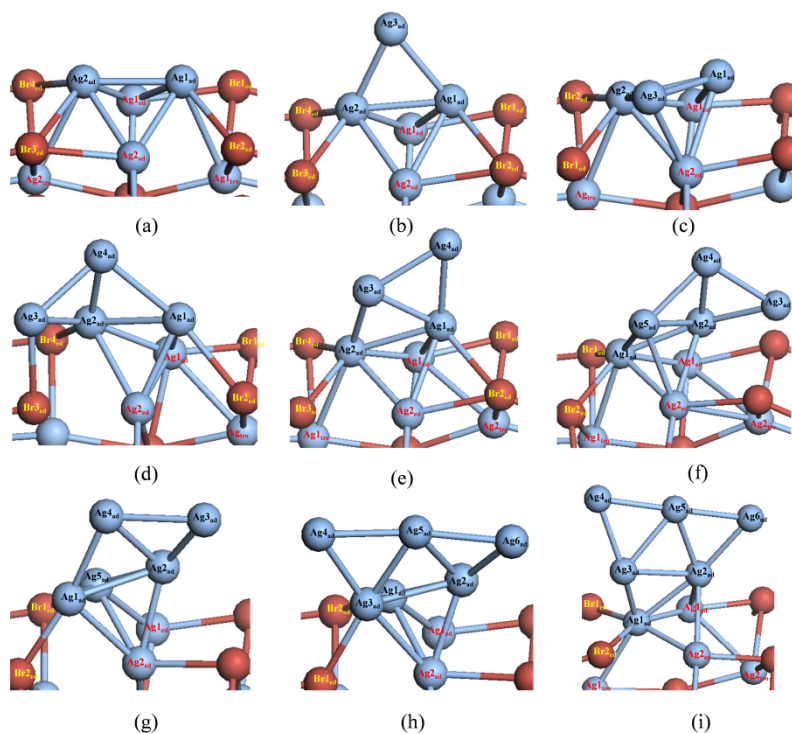

**Fig. S4.** The second most and third most stable structures of  $\text{Ag}_n/\text{AgBr}(110)$ . (a)  $\text{Ag}_2/\text{AgBr}(110)$ ; (b) and (c)  $\text{Ag}_3/\text{AgBr}(110)$ ; (d) and (e)  $\text{Ag}_4/\text{AgBr}(110)$ ; (f) and (g)  $\text{Ag}_5/\text{AgBr}(110)$ ; (h) and (i)  $\text{Ag}_6/\text{AgBr}(110)$ . Only two stable structures are found for  $\text{Ag}_2$  on the  $\text{AgBr}(110)$  surface. Silver and bromine atoms are indicated as light blue and wine spheres.

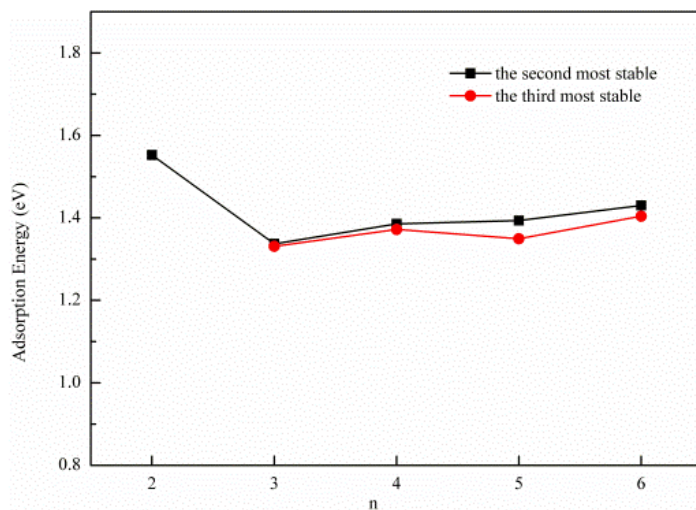

**Fig. S5.** Adsorption energies for the second most and third most stable structures of  $\text{Ag}_n/\text{AgBr}(110)$ .

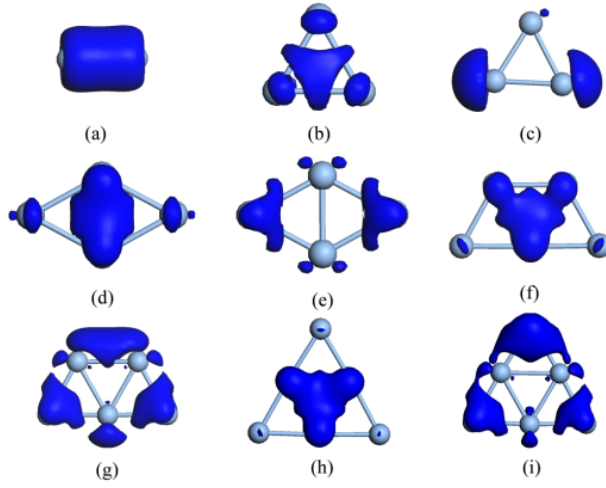

**Fig. S6.** The isosurface plots of wave functions for the free clusters. (a) at the Fermi level of  $\text{Ag}_2$ ; (b) and (c) below and at the Fermi level of  $\text{Ag}_3$ ; (d) and (e) below and at the Fermi level of  $\text{Ag}_4$ ; (f) and (g) below and at the Fermi level of  $\text{Ag}_5$ ; (h) and (i) below and at the Fermi level of  $\text{Ag}_6$ . Isovalue considered is  $0.02 \text{ electron}/\text{\AA}^3$ .

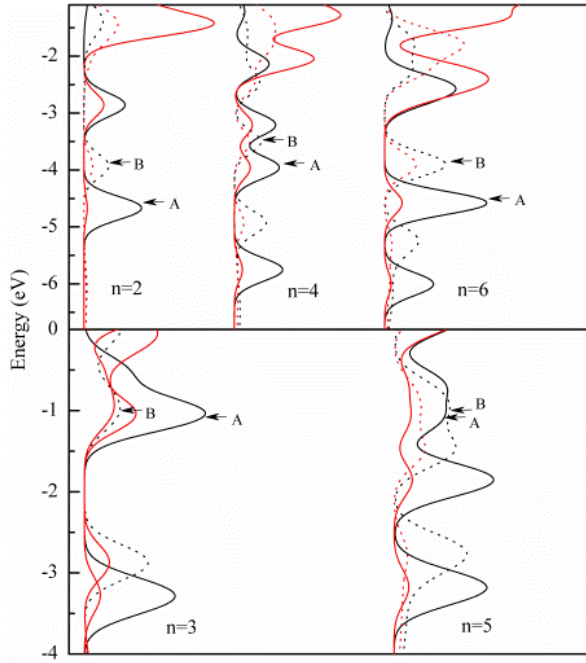

**Fig. S7.** Partial density of states (PDOSs) of the Ag 5s/5p states of  $\text{Ag}_n$  near the Fermi level. A and B represent the Fermi level of the free and adsorbed systems. Solid and dot lines denote free and adsorbed clusters; red and black lines denote Ag 5s and 5p states.

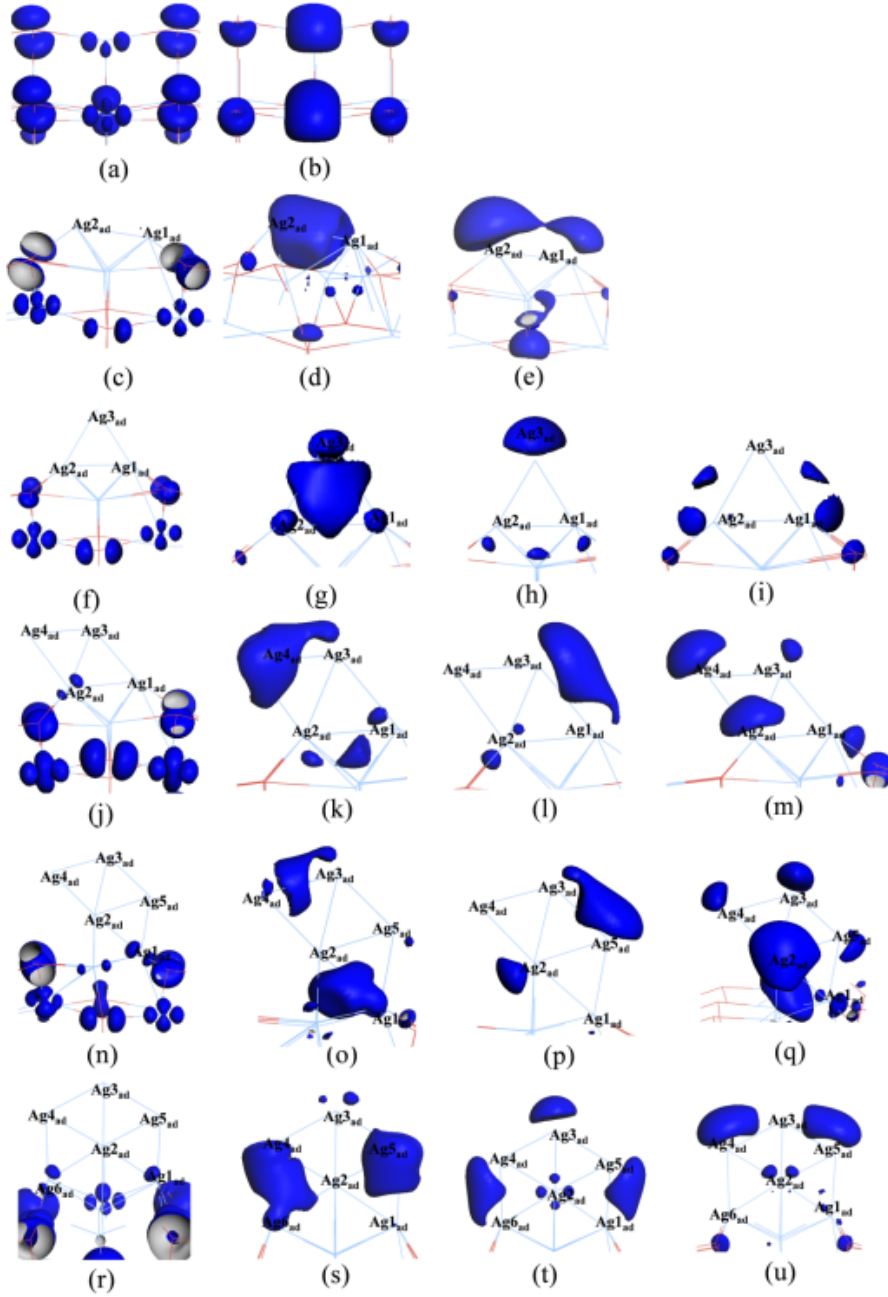

**Fig. S8.** The isosurface plots of wave functions for the clean and adsorbed AgBr(110) surfaces. (a) and (b) VBM and CBM of the clean surface; (c), (d) and (e) VB, MIGB and CB of Ag<sub>2</sub>/AgBr(110); (f), (g) and (h,i) VB, MIGB and CB of Ag<sub>3</sub>/AgBr(110); (j), (k) and (l, m) VB, MIGB and CB of Ag<sub>4</sub>/AgBr(110); (n), (o, p) and (q) VB, MIGB and CB of Ag<sub>5</sub>/AgBr(110); (r), (s) and (t, u) VB, MIGB and CB of Ag<sub>6</sub>/AgBr(110). Isovalue is 0.02 electron/Å<sup>3</sup> for the VB and 0.016 electron/Å<sup>3</sup> for the MIGB and CB.

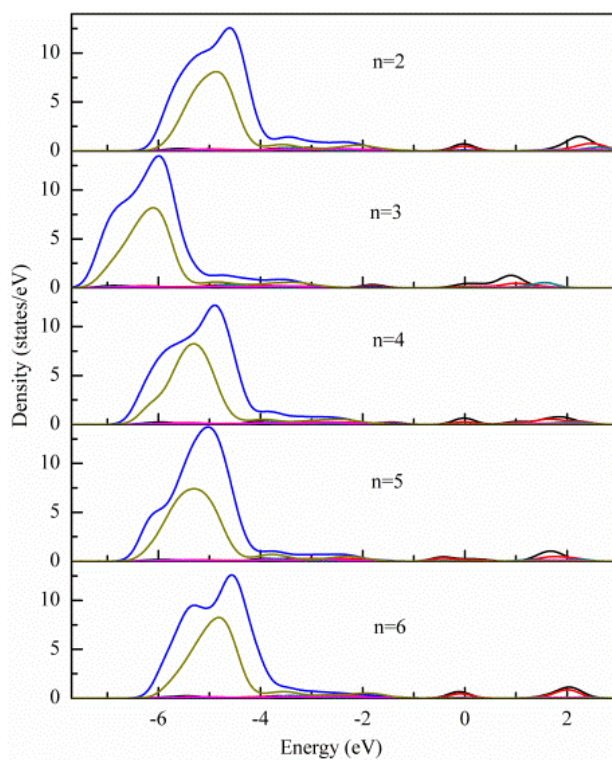

**Fig. S9.** The PDOS of  $\text{Ag}_{\text{ed}}$  and  $\text{Ag}_{\text{tro}}$  on the  $\text{Ag}_n/\text{AgBr}(110)$  surfaces. Black line is for  $\text{Ag}_{\text{ed}}$  5s, red line is for  $\text{Ag}_{\text{ed}}$  5p, blue line is for  $\text{Ag}_{\text{ed}}$  4d, dark cyan line is for  $\text{Ag}_{\text{tro}}$  5s, magenta line is for  $\text{Ag}_{\text{tro}}$  5p, dark yellow is for  $\text{Ag}_{\text{tro}}$  4d. The energy is referenced to the Fermi level of the  $\text{Ag}_n/\text{AgBr}$  system.



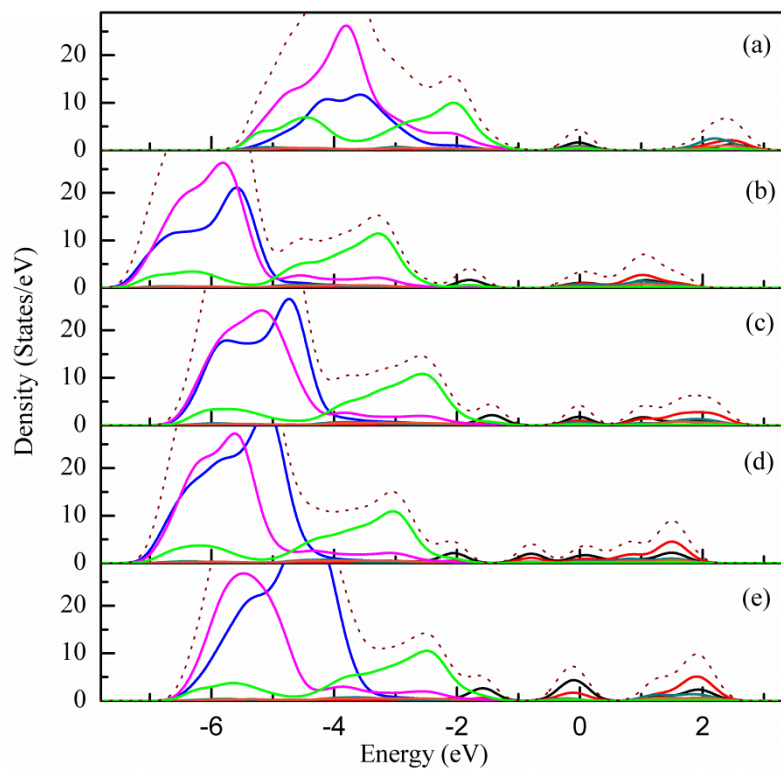

**Fig. S10.** Partial density of states (PDOSs) of cluster Ag 5s, 5p, 4d, surface Ag 5s, 5p, 4d and Br 4p states of the second most stable structures for (a) Ag<sub>2</sub>/AgBr(110), (b) Ag<sub>3</sub>/AgBr(110), (c) Ag<sub>4</sub>/AgBr(110), (d) Ag<sub>5</sub>/AgBr(110), (e) Ag<sub>6</sub>/AgBr(110). Black line is for Ag<sub>ad</sub> 5s, red line is for Ag<sub>ad</sub> 5p, blue line is for Ag<sub>ad</sub> 4d, dark cyan line is for Ag<sub>ed</sub> 5s, orange line is for Ag<sub>ed</sub> 5p, magenta line is for Ag<sub>ed</sub> 4d, green line is for Br<sub>ed</sub> 4p, and wine dot line is the sum of the local DOS of all Ag and Br atoms in the first layer of the adsorbed system. The energy is referenced to the Fermi level of the Ag<sub>n</sub>/AgBr system.



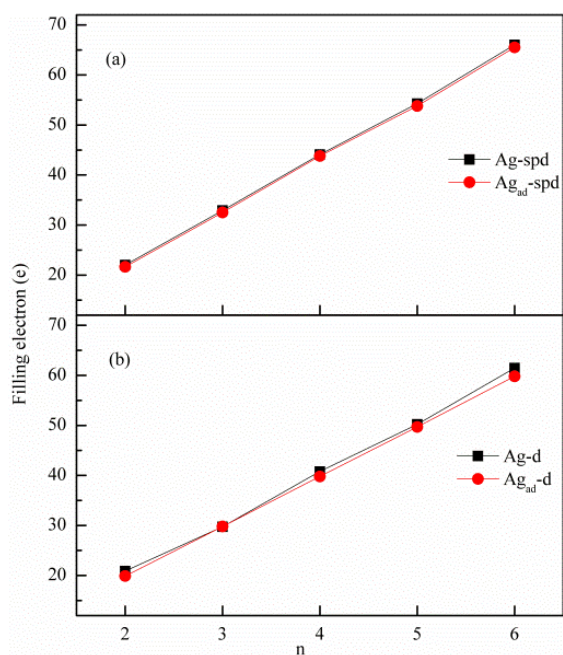

**Fig. S11.** The filling electron for free (black line) and adsorbed (red line) Ag clusters.

(a) spd filling electrons; (b) d filling electrons.

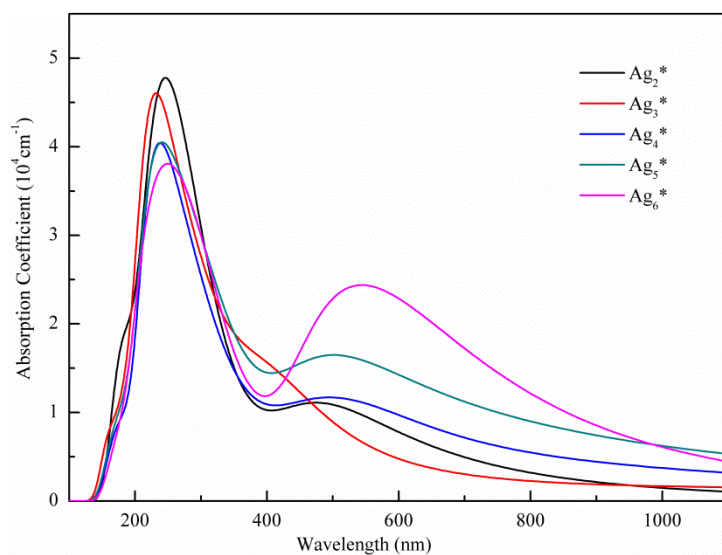

**Fig. S12.** The calculated optical absorption coefficients for the second most stable structures of  $\text{Ag}_n/\text{AgBr}(110)$  surfaces.

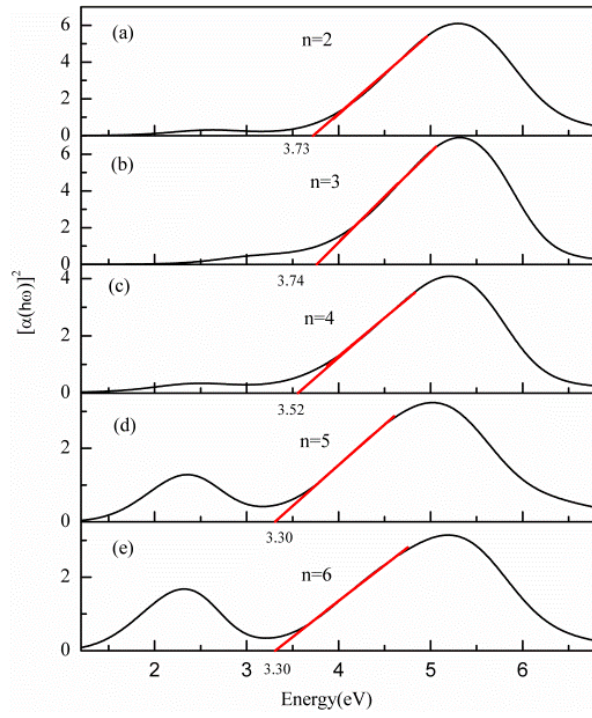

**Fig. S13.** The band gap estimation for the  $\text{Ag}_n/\text{AgBr}(110)$  systems.

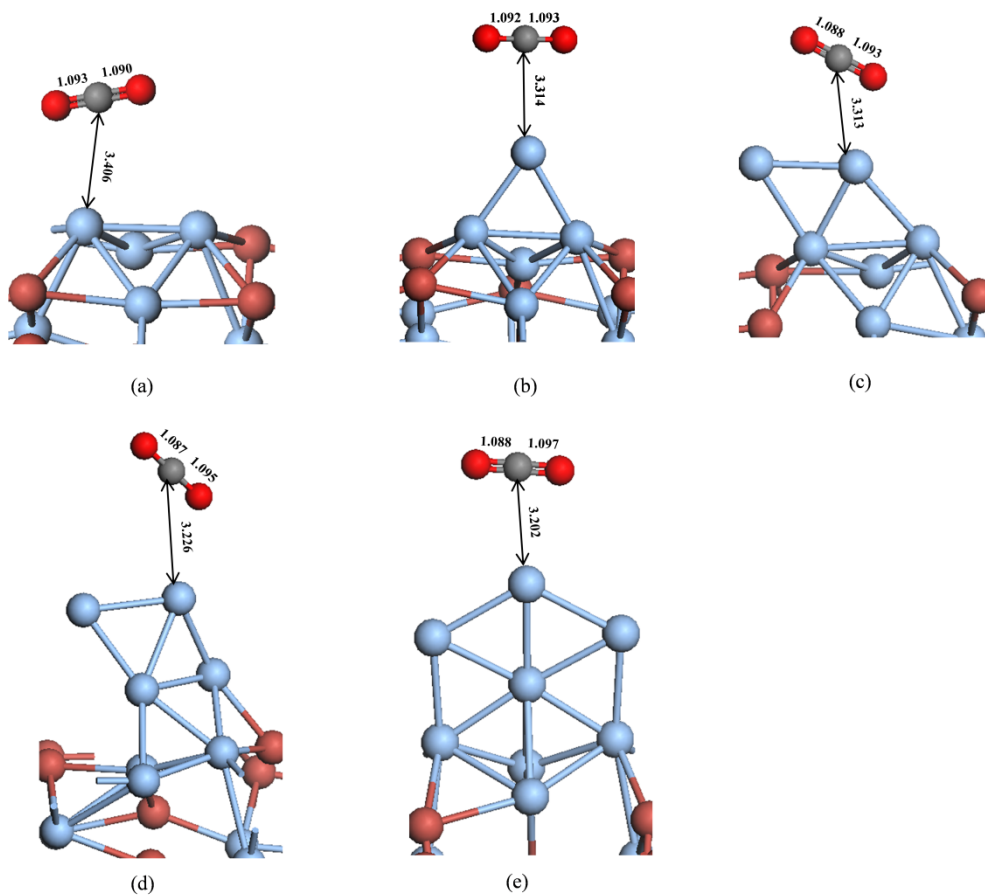

**Fig. S14.** The adsorption structures of CO<sub>2</sub> on the Ag<sub>n</sub>/AgBr(110) ( $n = 2 - 6$ ) surfaces.

Given on figures are the C-O bond length and the distance in Å.

**Table S1.** The d-band centers of the free and adsorbed silver clusters (in eV) as well as the shifts of the d-band centers (in eV) after adsorptions.

| Cluster         | Free ( $d_1$ ) | Adsorbed ( $d_2$ ) | $\Delta d$ |
|-----------------|----------------|--------------------|------------|
| Ag <sub>2</sub> | -7.93          | -8.34              | 0.41       |
| Ag <sub>3</sub> | -5.69          | -6.56              | 0.87       |
| Ag <sub>4</sub> | -7.70          | -8.22              | 0.52       |
| Ag <sub>5</sub> | -5.05          | -5.78              | 0.73       |
| Ag <sub>6</sub> | -7.65          | -8.01              | 0.36       |

**Section S1.** The Computational details of CO<sub>2</sub> adsorbed on the Ag<sub>n</sub>/AgBr(110)

surfaces:

The molecular CO<sub>2</sub> were adsorbed on the most stable structures of Ag<sub>n</sub>/AgBr(110) (n = 2 - 6) surfaces. The initial structures were assumed by the linear CO<sub>2</sub> molecular always keeping at a distance of 3.0 Å from the top of the Ag<sub>n</sub> clusters on the substrate, similar to the adsorption mode of oxygen on the Pt clusters <sup>[1]</sup>. The stable adsorption configurations of CO<sub>2</sub>/Ag<sub>n</sub>/AgBr(110) were optimized in CASTEP, using the parameters as mentioned in manuscript. The adsorption energy was calculated by the following formula:

$$E_{ad} = - \left( E_{CO_2/Ag_n/AgBr} - E_{Ag_n/AgBr} - E_{CO_2} \right)$$

**References**

[1] T. Imaoka, H. Kitazawa, W. -J. Chun, S. Omura, K. Albrecht, and K. Yamamoto, J. Am. Chem. Soc. 2013, 135, 13089–13095.
